# Supplementary material
Source: PubMed Central journal article supplement (PMC524047)
Supplement: pnas_101_42_15255__1.pdf [file pnas_101_42_15255__1.pdf]

**Table 4. Geographic origins of trees from which the maternally derived haploid DNA of the seed megagametophyte was isolated**

|                              | ID | Origin County | State |   | County     | State |
|------------------------------|----|---------------|-------|---|------------|-------|
| First-generation selections  | 1  | Pike          | AR    |   |            |       |
|                              | 2  | Union         | AR    |   |            |       |
|                              | 3  | Beaufort      | NC    |   |            |       |
|                              | 4  | Bertie        | NC    |   |            |       |
|                              | 5  | Craven        | NC    |   |            |       |
|                              | 6  | Craven        | NC    |   |            |       |
|                              | 7  | Northhampton  | NC    |   |            |       |
|                              | 8  | Onslow        | NC    |   |            |       |
|                              | 9  | Onslow        | NC    |   |            |       |
|                              | 10 | Tyrell        | NC    |   |            |       |
|                              | 11 | Williamsburg  | SC    |   |            |       |
|                              | 12 | Tyler         | TX    |   |            |       |
|                              | 13 | Southampton   | VA    |   |            |       |
|                              | 14 | unknown       |       |   |            |       |
| Second-generation selections | 15 | Fayette       | AL    | × | Tallapoosa | AL    |
|                              | 16 | Sumter        | AL    | × | Marengo    | AL    |
|                              | 17 | Tallapoosa    | AL    | × | Tallapoosa | AL    |
|                              | 18 | Little River  | AR    | × | McCurtain  | OK    |
|                              | 19 | Pike          | AR    | × | Sevier     | AR    |
|                              | 20 | Pike          | AR    | × | Sevier     | AR    |
|                              | 21 | Sevier        | AR    | × | McCurtain  | OK    |
|                              | 22 | Jasper        | GA    | × | Gwinnet    | GA    |
|                              | 23 | Morgan        | GA    | × | Jones      | GA    |
|                              | 24 | Polk          | GA    | × | Tyrell     | NC    |
|                              | 25 | Bienville     | LA    | × | Franklin   | MS    |
|                              | 26 | Craven        | NC    | × | Beaufort   | NC    |

|  | <b>ID</b> | <b>Origin County</b> | <b>State</b> |   | <b>County</b> | <b>State</b> |
|--|-----------|----------------------|--------------|---|---------------|--------------|
|  | 27        | Hertford             | NC           | × | Beaufort      | NC           |
|  | 28        | Northampton          | NC           | × | Brunswick     | VA           |
|  | 29        | McCurtain            | OK           | × | McCurtain     | OK           |
|  | 30        | Georgetown           | SC           | × | Orangeburg    | SC           |
|  | 31        | Georgetown           | SC           | × | Georgetown    | SC           |
|  | 32        | Tyler                | TX           | × | Franklin      | MS           |
