# Supplementary material
Source: PubMed Central journal article supplement (PMC524047)
Supplement: pnas_101_42_15255__2.pdf [file pnas_101_42_15255__2.pdf]

**Table 5. PCR primers and annealing temperatures used in this study**

| <b>Locus</b> | <b>Forward primer (5'-3')</b> | <b>Reverse primer (5'-3')</b> | <b>AT,<br/>°C</b> |
|--------------|-------------------------------|-------------------------------|-------------------|
| <i>pal</i>   | TTCCTGTGTTTGAAGCCGAGC         | TGATCTGCCACCCTTACATATTTCTG    | 60                |
| <i>c4h-1</i> | TGAACGCGGGAGGTTGG             | GCGAATCTGTAGTGCTGGACAA        | 59                |
|              | TCATGACTGTGCCTTTCTTTACGAAT    | CGCTCAAATAGCTGACTAAACTCTGTTC  | 60                |
|              | TTTTAGATGCTCAGAACAAGGGAGAGAT  | AATGGACAGCAACCCAGGCA          | 61                |
|              | CGGTGCCTGCCCTTATTGG           | CCATTGGCTTCGGTGTGCTT          | 61                |
|              | AGAAGCACACCGAAGCCAATG         | CTCTTAGTAGACTCGACAGTGGACACG   | 60                |
| <i>c4h-2</i> | ATGGGGACTCGCCGAAATC           | TGAGCTTCAGGCTATTGGTTTGG       | 60                |
| <i>4cl</i>   | ATCTCCGACCATCTGCCTCTTC        | ACATCACGCCCTTGGGGA            | 60                |
|              | TTCTGACCGAAGCCGACGA           | TAGGTTTCATTGCCAGCACCG         | 60                |
|              | TCGAAGATGCCCTCAGAGAGC         | TAGGTTTCATTGCCAGCACCG         | 60                |
|              | TCTGGCTCCTGCGGAACAGT          | AGGAACGACTGCTGCGTCAG          | 60                |
|              | GCTTTACTTGTGGCTCATCCGTC       | AGGGCGCTTACTCTGCACCA          | 60                |
| <i>c3h</i>   | GTTCTGCAGGGGAATGTCTGTTC       | ACCAGTGGGAAGCCAATGGA          | 60                |
|              | CTACAGAAGGAATCGGCAAGCC        | CAGTTAAAGAATCATTGCGGGAAGT     | 60                |
|              | TCCTCTGGGTAAGCCATAAGCCTA      | TCATCACTCTGTCCCTGCCAAC        | 60                |
|              | AACTTGTTGCAATCCCCGA           | TGTGAGATCTATGTCTTCTGCCTG      | 60                |
|              | TTCGTATGGGCACCTCCTGAG         | TGCAAGGCAAATGTTTCAGACC        | 60                |

| <b>Locus</b>    | <b>Forward primer (5'-3')</b> | <b>Reverse primer (5'-3')</b> | <b>AT,<br/>°C</b> |
|-----------------|-------------------------------|-------------------------------|-------------------|
| <i>ccoaomt</i>  | GCAGCAGAAGTGAAGGCTCAGA        | TCTTTCATCATCGGGCAATG          | 60                |
| <i>ccr</i>      | AGTGGCCGAGAAGGCTGC            | TGGGAACGAAAGTTAAGTAGGATTTATG  | 59                |
|                 | TTACAAC TTTACATCAAGGCATTGCTT  | CTCATA CAGGCATTGTTTCGCTG      | 59                |
| <i>comt-2</i>   | CGAAATGGGATCGGCTTCC           | CCTGAACCTCCTTAAAACCCTCG       | 60                |
|                 | CGAGGGTTTTAAGGAGGTT CAGG      | GCAATCACTGCTTTAGGGTATTCCA     | 60                |
| <i>cad</i>      | CCTCTGTTATGTGCAGGGGTTACA      | CGAAGTGCAACGGCTCTGG           | 60                |
| <i>sam-1</i>    | CTCTCCCGCTTCTCACTTGCTT        | GGTCCATTCTTTCTGACCTCTGTG      | 60                |
| <i>sam-2</i>    | GTGGACCGAAGTGGGGCAT           | GGTCAATATGTGAATGGAACCGAATA    | 60                |
| <i>glyhmt</i>   | CAAATGCGGTTGCTGTTGGTA         | AATCTGCTCAAATCGGCTTCC         | 59                |
|                 | CTTTGTCGTTGAGAGAGTGAAATAGTGTC | AGTGAGCAAAC T GACGGCTGG       | 60                |
| <i>ptlim-1</i>  | TGGTTGTGTTATCAGTCCCTCAAAC T   | CGGTAAC T GCCACTAATAGCCACTT   | 60                |
| <i>ptlim-2</i>  | ATCATA C CACCGACCTTGCTTCA     | CTGCCCAACAGCATAACACTATCTTT    | 60                |
| <i>cesA3</i>    | GGTTGTTGGCGTAGCAGATGC         | GCTTGGAGCCTCTGAAGTGTTTCT      | 60                |
| <i>agp-like</i> | CCCACAGTCTCAGTCCCAATCC        | TGCCGAATGCGGTGACG             | 61                |
|                 | TCGACAAGGTGCTCCTGCC           | ACAAAAGATTCACTGACCCAACGAT     | 60                |
| <i>agp-4</i>    | TGAAGTTCCCGCCGAAAGC           | GATCCCCTGAAATCCGTTTACTACATAC  | 60                |
| <i>agp-6</i>    | TCAGGGTCAACAATGGCGTTC         | GGGCTTTTCAGTGCGGACG           | 61                |
|                 | GCCTTCTACCTCCGCCGAT           | ATCTATTTCAGCAAAGCCCAA         | 59                |

| <b>Locus</b>     | <b>Forward primer (5'-3')</b> | <b>Reverse primer (5'-3')</b> | <b>AT,<br/>°C</b> |
|------------------|-------------------------------|-------------------------------|-------------------|
| <i>α-tubulin</i> | GGTGGTATTGCAGGAGGCGT          | CTATAGAGAAACAGACTGGGCAATGC    | 60                |
|                  | TGTTGTGTTGACTTATTTAGGCTAGGGT  | AGTTGTTGGCCGCATCTTCC          | 60                |

AT, annealing temperature.
